# Supplementary material
Source: HighWire-hosted journal article supplement (https://www.cmaj.ca/highwire/filestream/59826/field_highwire_adjunct_files/0/160108-dec-1-at.pdf)
Supplement: 160108-dec-1-at.pdf [file 160108-dec-1-at.pdf]

## Appendix 1: Clinical decision-making algorithm for acute Bell palsy\*

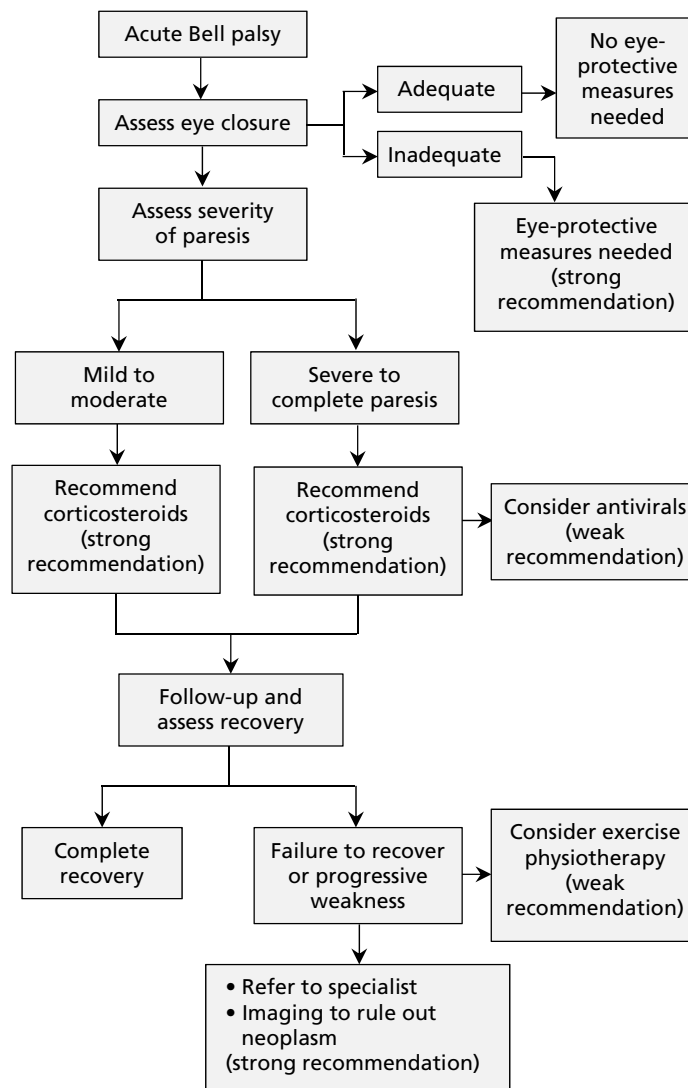

\*Reproduced from: de Almeida JR, Guyatt GH, Sud S, et al. Management of Bell palsy: clinical practice guideline. *CMAJ* 2014;186:917-22. Copyright © Joule Inc.
